# Supplementary material
Source: PubMed Central journal article supplement (PMC6141015)
Supplement: NIHMS79341-supplement-Expanded_View.pdf [file NIHMS79341-supplement-Expanded_View.pdf]

## Expanded View Figures

### Figure EV1. TRIM16 is important for assembly of the protein aggregates.

- A Confocal images of HeLa and TRIM16<sup>KO</sup> cells, untreated or treated with MG132 (20  $\mu$ M, 2 h), H<sub>2</sub>O<sub>2</sub> (200  $\mu$ M, 2 h), and puromycin (5  $\mu$ g/ml, 2 h), and processed for immunofluorescence (IF) analysis with ubiquitin (FK2) antibody.
- B HeLa and TRIM16<sup>KO</sup> cells were visualized, and cells with more than two visible aggresomes/ALIS were considered positive. Mean  $\pm$  SD,  $n = 3$ , \*\* $P < 0.005$  (Student's unpaired  $t$ -test).
- C Total numbers of visible Ub puncta in each cell were counted and plotted. Data are from  $\geq 10$  microscopic fields for each condition,  $n = 3$ , mean  $\pm$  SD, \* $P < 0.05$  (Student's unpaired  $t$ -test).
- D Representative confocal images of control siRNA and TRIM16 siRNA transfected cells treated with puromycin (5  $\mu$ g/ml, 2 h), where IF analysis was conducted with Ub and p62 antibodies.
- E The graph shows the average number of Ub-p62 co-localized aggregates per cell from the experiment in panel (D). Mean  $\pm$  SD,  $n = 3$ , \* $P < 0.05$  (Student's unpaired  $t$ -test).
- F Representative confocal images of HeLa and TRIM16<sup>KO</sup> cells treated with As<sub>2</sub>O<sub>3</sub> (2.5  $\mu$ M, 2 h), where IF analysis was conducted with Ub and p62 antibodies. Right panel: Fluorescence intensity line is tracing corresponding to a white line in zoom panel.
- G, H Representative confocal images of HeLa and TRIM16<sup>KO</sup> cells treated with (G) MG132 (20  $\mu$ M, 2 h) or (H) H<sub>2</sub>O<sub>2</sub> (200  $\mu$ M, 2 h) and processed for IF analysis with Ub and LC3B antibody.
- I WB analysis of LC3B levels in lysates of cells transfected with control vector or Flag-TRIM16.
- J Densitometric analysis of WB normalized with actin. Mean  $\pm$  SD, \* $P < 0.05$  (Student's unpaired  $t$ -test),  $n = 3$ .
- K Representative confocal images HeLa and TRIM16<sup>KO</sup> cells treated with H<sub>2</sub>O<sub>2</sub> (200  $\mu$ M, 2 h) and processed for IF analysis with ProteoStat dye and p62 antibody.

Data information: Unless otherwise stated, scale bar: 10  $\mu$ m.

Source data are available online for this figure.

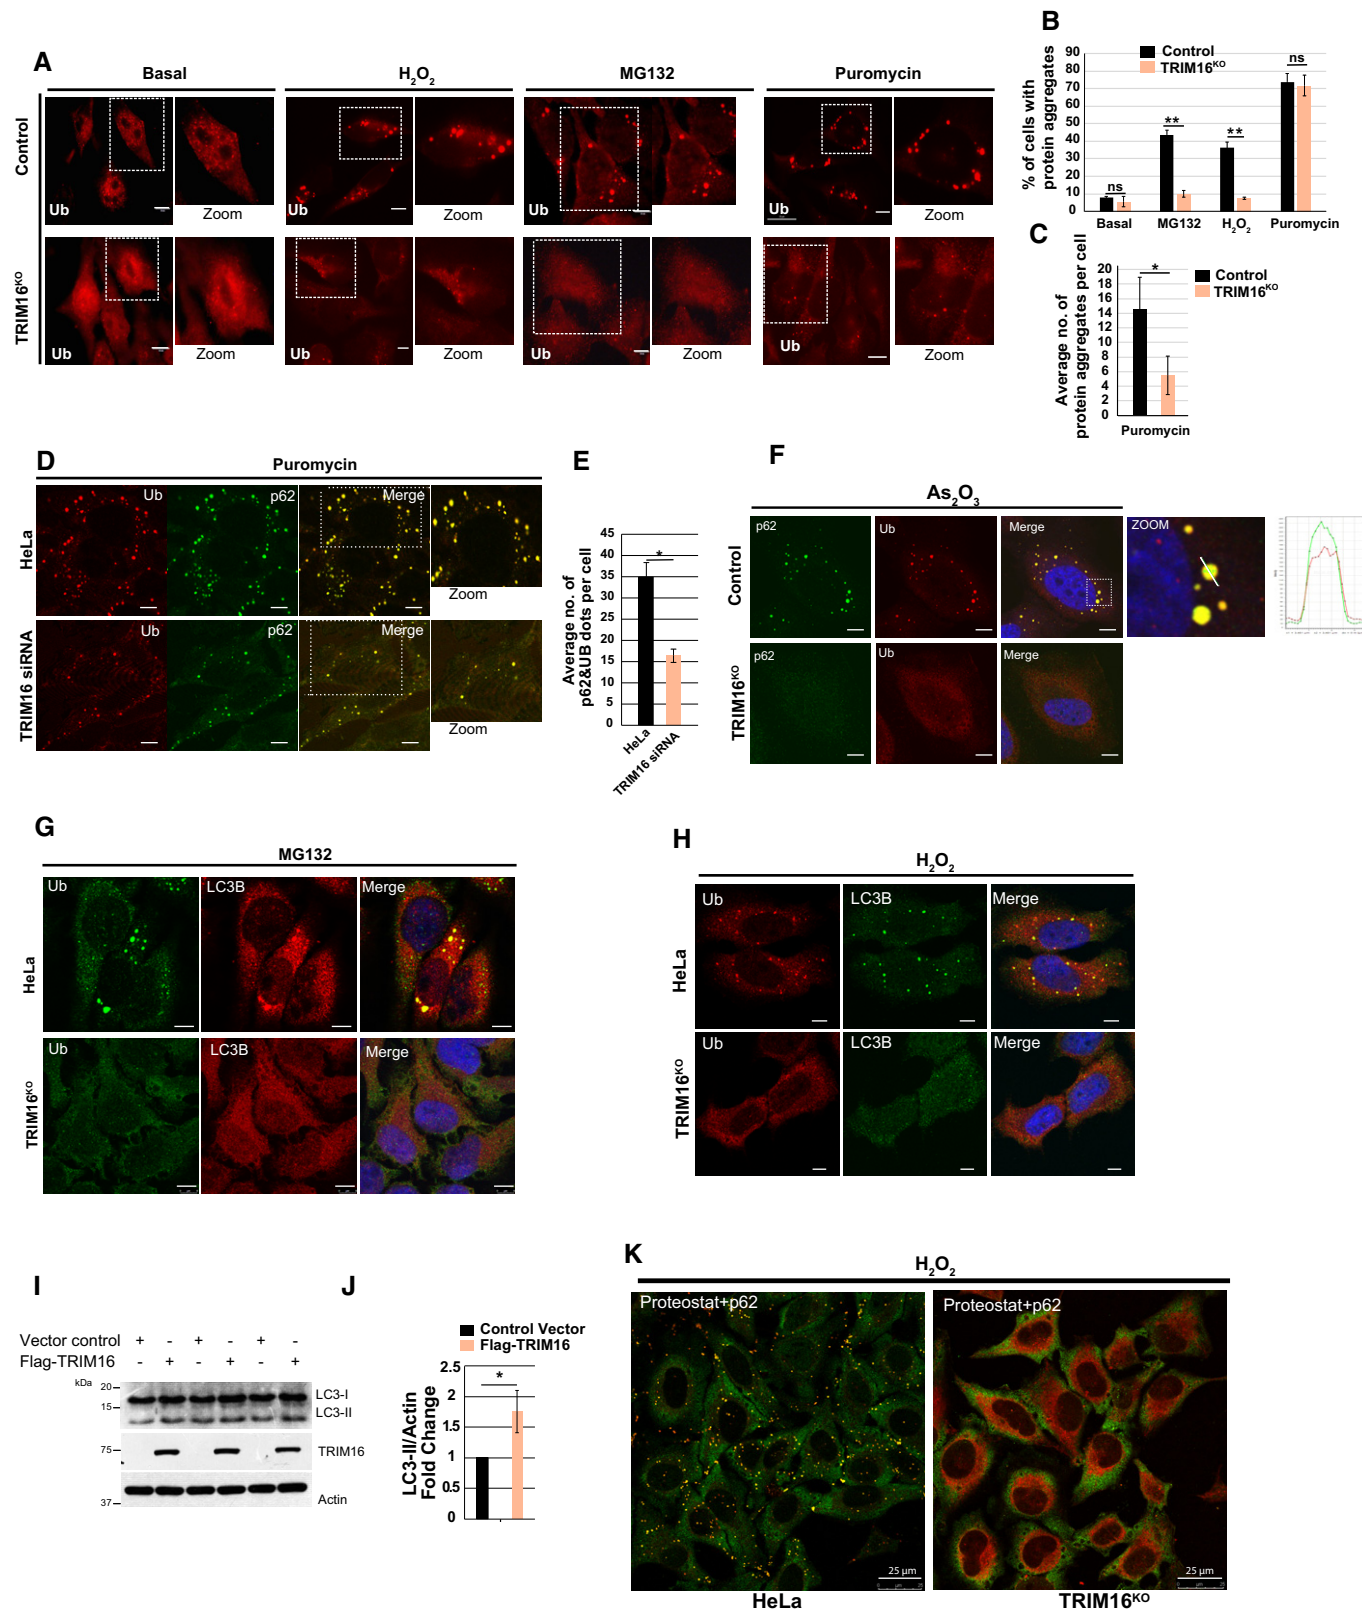

Figure EV1.

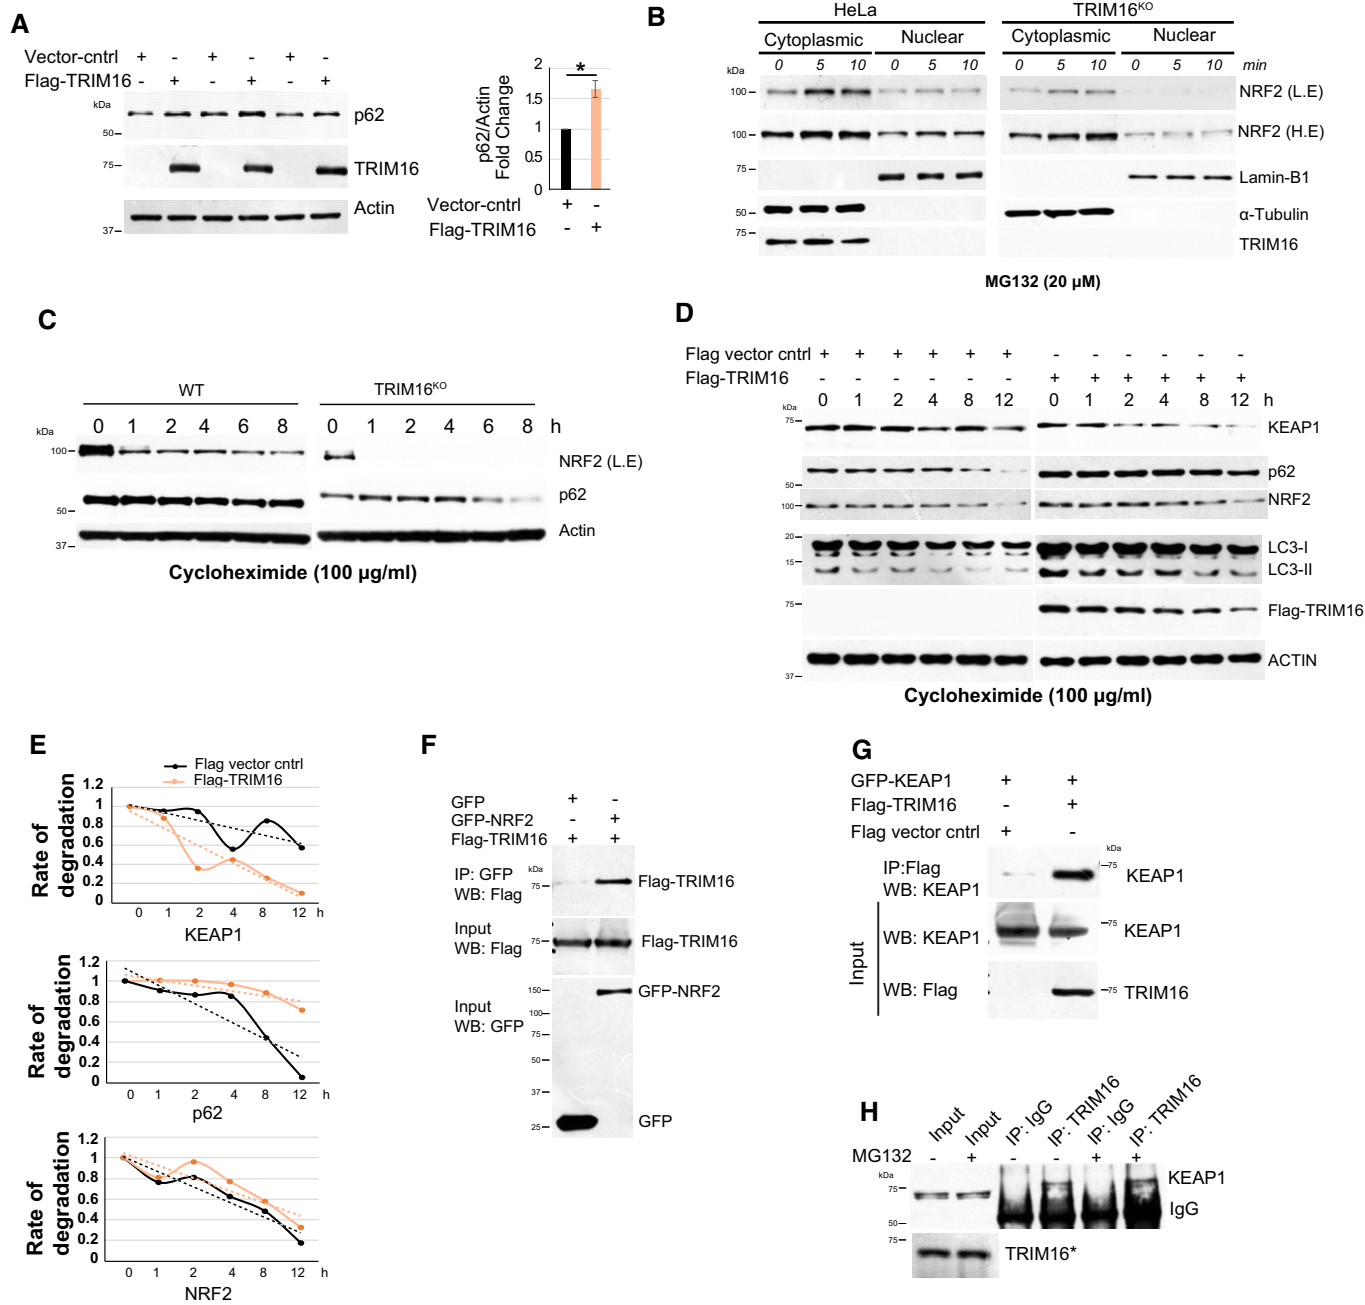

**Figure EV2. TRIM16 interacts with and regulates the expression of p62, KEAP1, and NRF2.**

**A** Left panel, HEK293T cells were either transiently transfected with an empty vector or a Flag-tagged-TRIM16 expressing vector and immunoblotted with Flag or indicated antibodies. Right panel, densitometric analysis (mean  $\pm$  SD) of protein band intensity relative to actin,  $n = 3$ , \* $P < 0.05$  (Student's unpaired t-test).

**B** Western blot analysis of cytoplasmic and nuclear fraction isolated from MG132-treated control and TRIM16<sup>KO</sup> cells.

**C** WB analysis of HeLa and TRIM16<sup>KO</sup> lysates of cells treated with cycloheximide (100  $\mu$ g/ml) for the indicated period and probed with different antibodies as indicated. The blots of control and TRIM16<sup>KO</sup> cells are exposed for the equal duration and developed together on the same X-ray film.

**D** WB analysis of control or Flag-TRIM16 vector transfected HeLa cells treated with cycloheximide (100  $\mu$ g/ml) for the indicated period and probed with different antibodies as indicated. The blots of control and overexpressed cells are exposed for the equal duration and developed together on the same X-ray film.

**E** Quantification of KEAP1, p62, and NRF2 band intensities (from panel D) relative to actin.

**F** Co-IP analysis of the interaction between TRIM16 and NRF2 in HEK293T lysates of cells expressing GFP or GFP-NRF2 and Flag-TRIM16.

**G** Co-IP analysis of the interaction between TRIM16 and KEAP1 in HEK293T lysates of cells expressing vector control or Flag-TRIM16 and GFP-KEAP1.

**H** IP analysis of the interaction between endogenous TRIM16 and endogenous KEAP1 in HeLa cell lysates in absence and presence of MG132. \*The panel (H) here, Fig 2J, and Appendix Fig S3H are part of same blots; hence, the input for TRIM16 is same.

Source data are available online for this figure.

**Figure EV3. TRIM16 regulates ubiquitination of NRF2 and governs the NRF2 stress responses.**

- A Representative confocal images of HeLa, TRIM16<sup>KO</sup> cells, and TRIM16<sup>KO</sup> cells complemented with TRIM16 deletion constructs where cells were treated with MG132 (20  $\mu$ M, 2 h) and the samples were processed for IF analysis with Ub antibody.
- B The graph shows the percentage of cells with Ub-positive protein aggregates. Data from  $\geq 10$  fields (40 $\times$ ),  $n = 3$ , mean  $\pm$  SD, \* $P < 0.005$  (Student's unpaired  $t$ -test).
- C HeLa and TRIM16<sup>KO</sup> cells were treated with MG132 (10  $\mu$ M, 4 h), and lysates were subjected to Western blotting with indicated antibodies.
- D WB analysis of HeLa and TRIM16<sup>KO</sup> lysates of cells treated with MG132 (10  $\mu$ M, 4 h) or/and BafA1 (300 nM, 4 h) as indicated and probed with antibodies as shown.
- E HeLa and TRIM16<sup>KO</sup> cells were treated with MG132 (10  $\mu$ M, 4 h), and lysates were subjected to Western blotting with indicated antibodies.
- F Quantification of UB lane intensity relative to actin. Mean  $\pm$  SD,  $n = 3$ , \* $P < 0.05$ .
- G HeLa and TRIM16<sup>KO</sup> cells were treated with MG132 (10  $\mu$ M, 4 h), and lysates were subjected to Western blotting with K48 and K63 and other indicated antibodies.
- H–J RNA isolated from HeLa and TRIM16<sup>KO</sup> cells, untreated or treated with MG132 (20  $\mu$ M, 2 h), were subjected to qRT-PCR with primers of genes as indicated. The fold induction in MG132-treated samples is calculated relative to untreated samples. Mean  $\pm$  SD,  $n = 3$ , \* $P < 0.05$ , #Insignificant.

Data information: Unless otherwise stated, scale bar: 10  $\mu$ m.

Source data are available online for this figure.

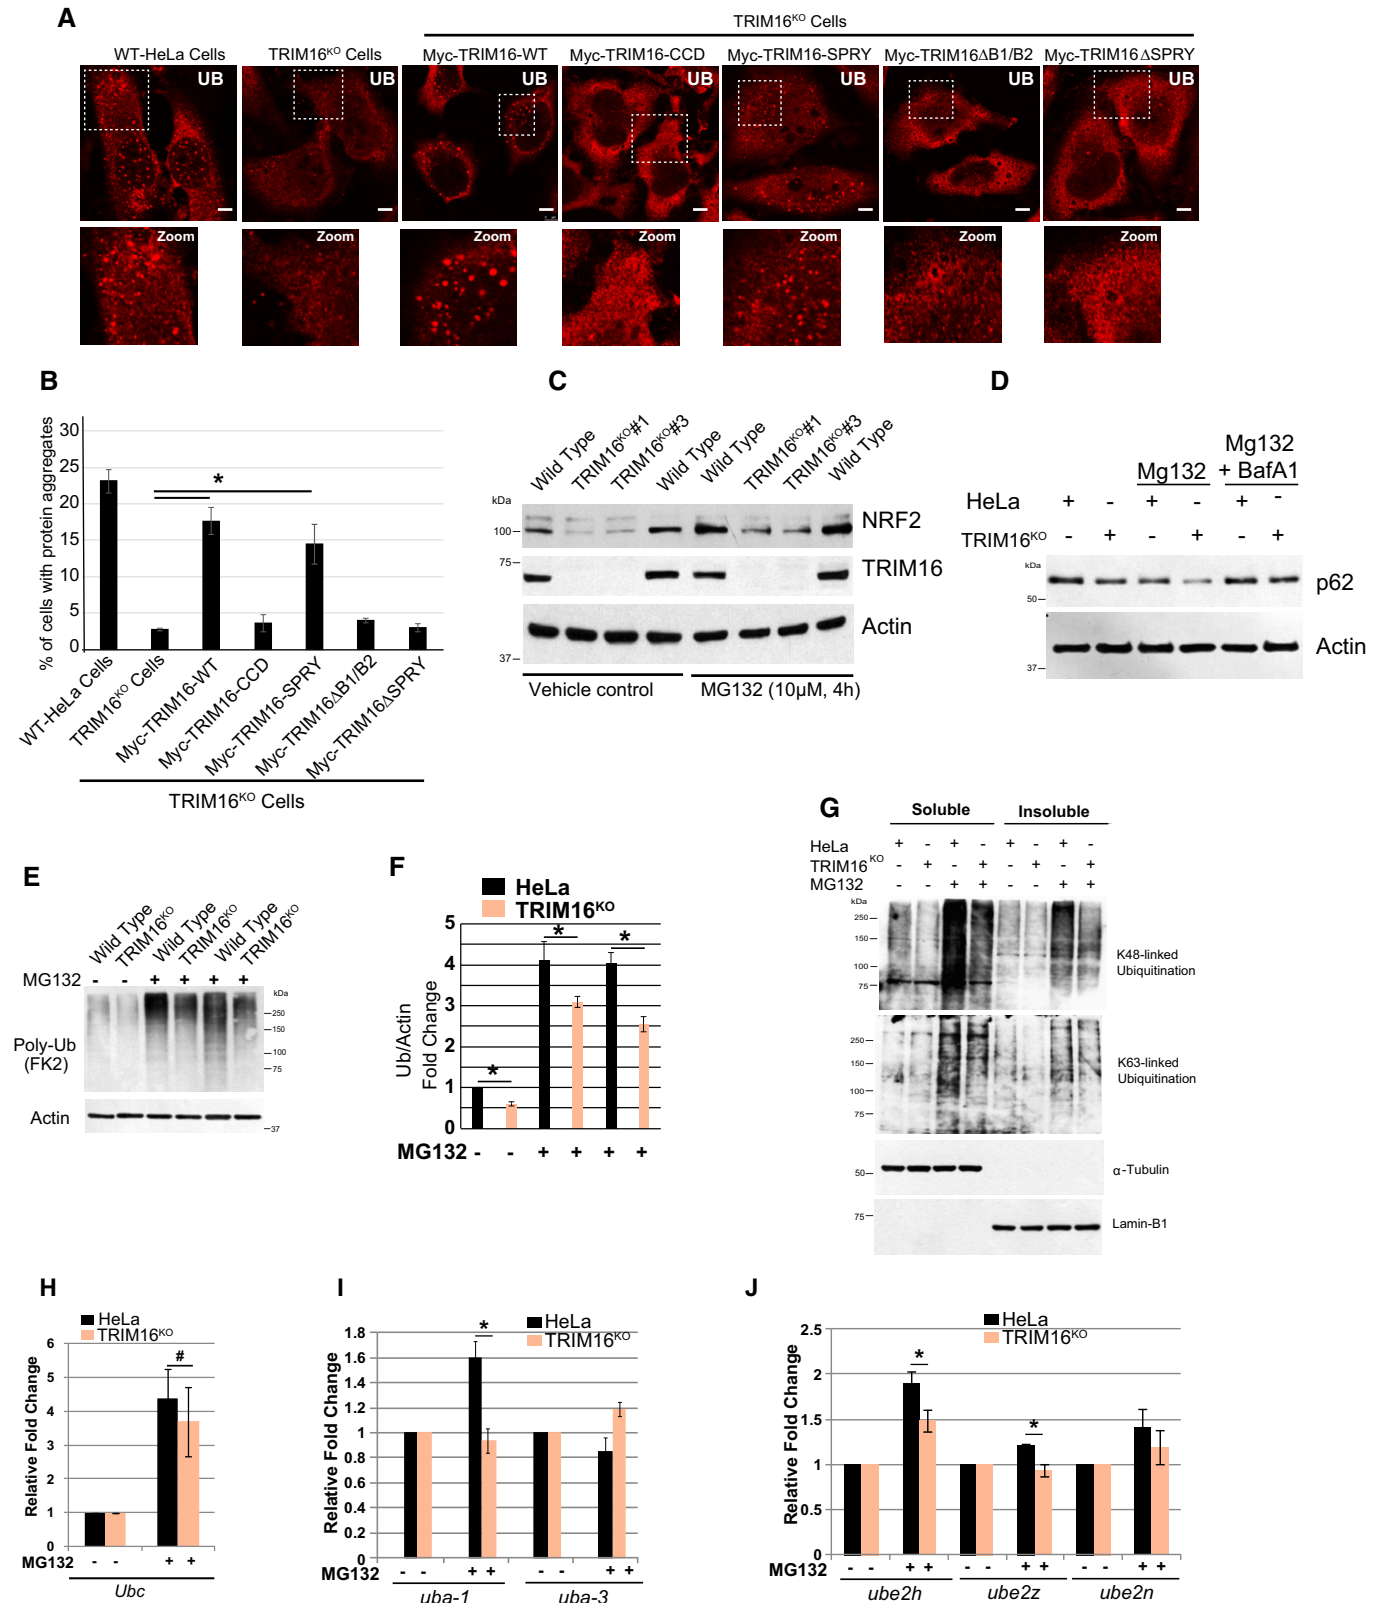

Figure EV3.

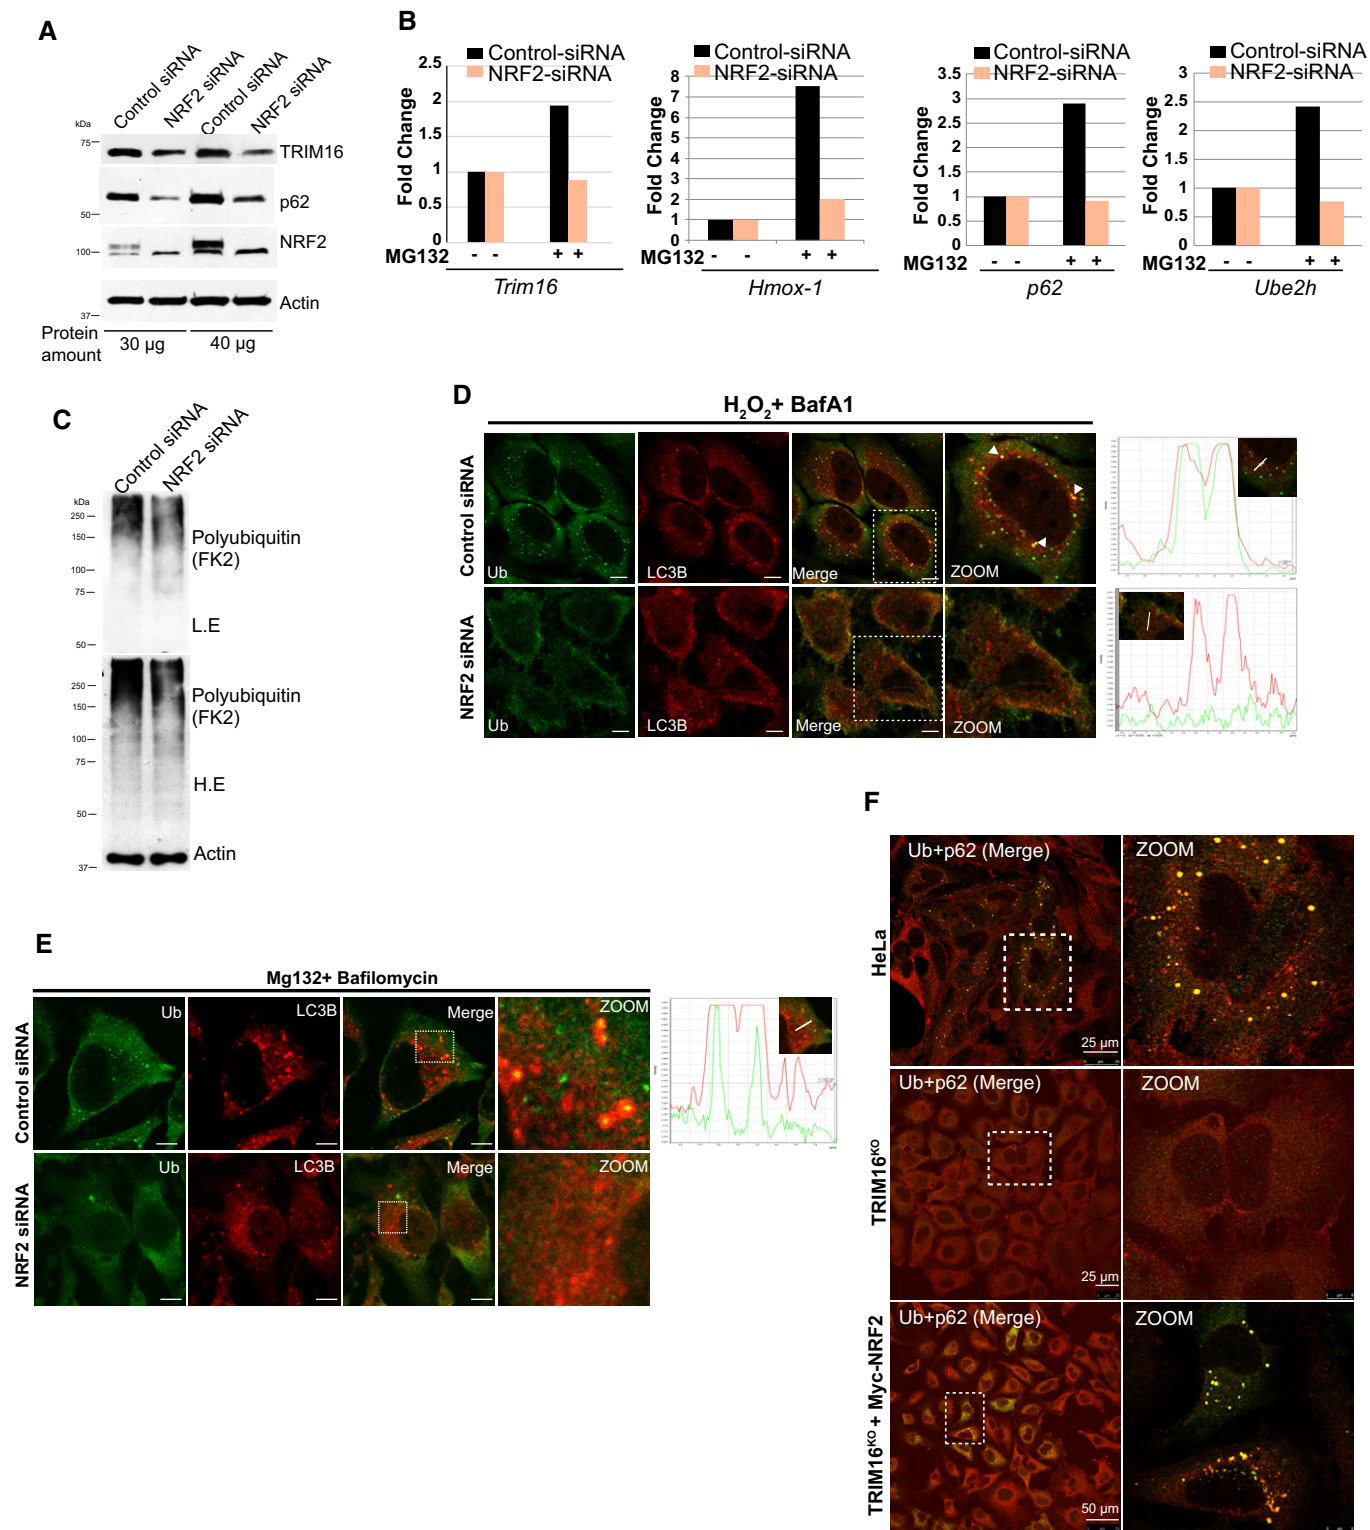

Figure EV4

**Figure EV4. NRF2 regulates TRIM16, ubiquitin pathway genes expression, and biogenesis of protein aggregates.**

- A Control or NRF2 siRNA transfected HeLa cells lysates were subjected to Western blotting with indicated antibodies (different protein concentrations as indicated).
- B RNA isolated from untreated or MG132-treated control (20  $\mu$ M, 2 h) or NRF2 siRNA transfected cells were subjected to qRT-PCR with primers of genes as indicated. The fold induction in MG132-treated samples is calculated relative to untreated samples.
- C WB analysis of control siRNA or NRF2 siRNA transfected lysates of HeLa cells probed with antibodies as shown.
- D Left panels: Confocal images of control and NRF2 siRNA transfected cells treated with H<sub>2</sub>O<sub>2</sub> (200  $\mu$ M, 2 h) where IF analysis was conducted with Ub and LC3B antibodies. Right panels: Fluorescence intensity line is tracing corresponding to a white line in zoom panel. Arrowheads indicate the puncta where co-localization between UB and LC3B is observed.
- E Representative confocal images of control and NRF2 siRNA transfected cells treated with MG132 (20  $\mu$ M, 2 h) and bafilomycin A1 (300 nM, 3 h) and IF analysis was conducted with Ub and LC3B antibodies. Right panels: fluorescence intensity line is tracing corresponding to the white line (inset).
- F Representative confocal images of HeLa cells, TRIM16<sup>KO</sup> cells, and TRIM16<sup>KO</sup> cells complemented with Myc-NRF2 were treated with MG132 (20  $\mu$ M, 2 h) and subjected to IF with Ub and p62 antibodies.

Data information: Unless otherwise stated, scale bar: 10  $\mu$ m.

Source data are available online for this figure.

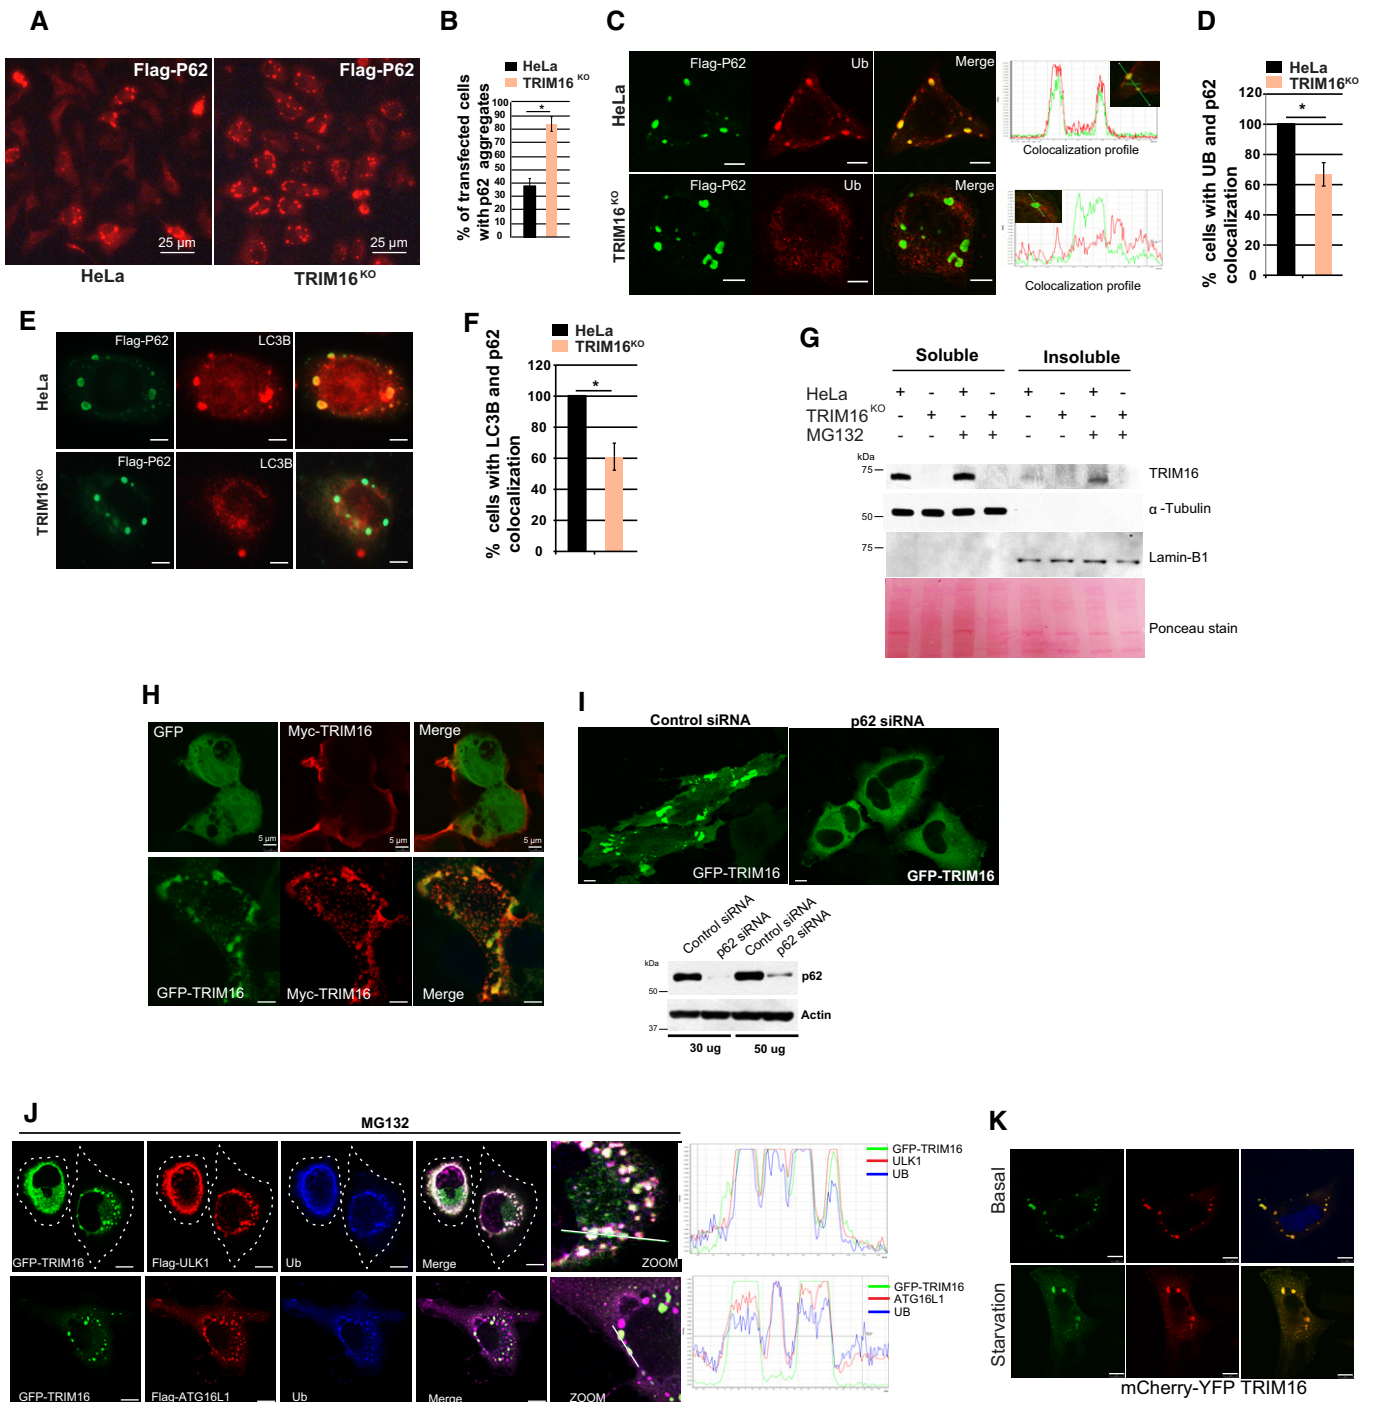

Figure EV5.



**Figure EV5. TRIM16 mediates selective clearance of aggregated autophagy cargoes.**

- A Representative confocal images of HeLa and TRIM16<sup>KO</sup> cells transiently expressing Flag-p62.
- B The graph shows the percentage of transfected cells with p62-aggregates. Data from  $\geq 10$  microscopic fields for each condition (40 $\times$ ),  $n = 3$ , mean  $\pm$  SD, \* $P < 0.05$  (Student's unpaired  $t$ -test).
- C–F (C, E) Representative confocal images of HeLa and TRIM16<sup>KO</sup> cells expressing Flag-p62 and IF analysis was performed with Flag and (C) Ub or (E) LC3B antibodies. (D, F) The graph shows the percentage of cells with p62-Ub (D) or p62-LC3B (F) co-localized aggregates. Data from  $\geq 10$  microscopic fields,  $n = 3$ , mean  $\pm$  SD, \* $P < 0.05$  (Student's unpaired  $t$ -test).
- G WB analysis of detergent-soluble and detergent-insoluble fractions of HeLa and TRIM16<sup>KO</sup> cells, untreated or treated with MG132 (10  $\mu$ M, 4 h), and probed with indicated antibodies.
- H Representative confocal images of HEK293T cells transiently expressing GFP-TRIM16 and Myc-TRIM16.
- I Upper panel, representative confocal images of control or p62 siRNA transfected HeLa cells transiently expressing GFP-TRIM16. Lower panel, WB showing the knockdown efficiency of p62 siRNA.
- J Representative confocal images of HeLa cells expressing GFP-TRIM16, Flag-ULK1, or Flag-ATG16L1 treated with MG132 (10  $\mu$ M, 4 h) and/or bafilomycin A1 (300 nM, 3 h) and IF analysis is performed with antibodies as indicated. Right: Fluorescence intensity line is tracing corresponding to the white line.
- K Representative confocal images of starved and unstarved HEK293T cells transiently expressing mcherry-YFP-TRIM16.

Data information: Unless otherwise stated, scale bar: 10  $\mu$ m.

Source data are available online for this figure.
